# Supplementary material
Source: PubMed Central journal article supplement (PMC7502540)
Supplement: NIHMS1601243-supplement-1601243_Supp_Tab1_Legend-of-Tab2-4_Supp_Fig1.pdf [file NIHMS1601243-supplement-1601243_Supp_Tab1_Legend-of-Tab2-4_Supp_Fig1.pdf]

**Supplement to:**

**Pharmacologic IRE1/XBP1s Activation Confers Targeted ER Proteostasis Reprogramming**

Julia M.D. Grandjean<sup>1</sup>, Aparajita Madhavan<sup>1</sup>, Lauren Cech<sup>1</sup>, Bryan O. Seguinot<sup>1</sup>, Ryan J. Paxman<sup>2</sup>, Emery Smith<sup>3</sup>, Louis Scampavia<sup>3</sup>, Evan T. Powers<sup>2</sup>, Christina B. Cooley<sup>4</sup>, Lars Plate<sup>5</sup>, Timothy P. Spicer<sup>3</sup>, Jeffery W. Kelly<sup>2</sup>, R. Luke Wiseman<sup>1,\*</sup>

<sup>1</sup>Department of Molecular Medicine, The Scripps Research Institute, La Jolla, CA; <sup>2</sup>Department of Chemistry, The Skaggs Institute for Chemical Biology, The Scripps Research Institute, La Jolla, CA; <sup>3</sup>Scripps Research Molecular Screening Center, The Scripps Research Institute, Jupiter, FL; <sup>4</sup>Department of Chemistry, Trinity University, San Antonio, TX; <sup>5</sup>Departments of Chemistry and Biological Sciences, Vanderbilt University, Nashville, TN

\*To whom correspondence should be addressed:

R. Luke Wiseman

Department of Molecular Medicine

The Scripps Research Institute

La Jolla, CA 92037

Email: [wiseman@scripps.edu](mailto:wiseman@scripps.edu)

Phone: (858) 784-8820

Running Title: Establishment of IRE1/XBP1s Activator Compounds

Keywords: unfolded protein response (UPR); IRE1; endoplasmic reticulum (ER) proteostasis; protein secretion; proteotoxicity

## FIGURE LEGENDS

### Figure 1. (Chemical characterization of compound IXA4)

HPLC trace from **IXA4** purification confirms >95% purity.  $^1\text{H}$  NMR and  $^{13}\text{C}$  NMR confirm identity of compound **IXA4**.

Figure 1.

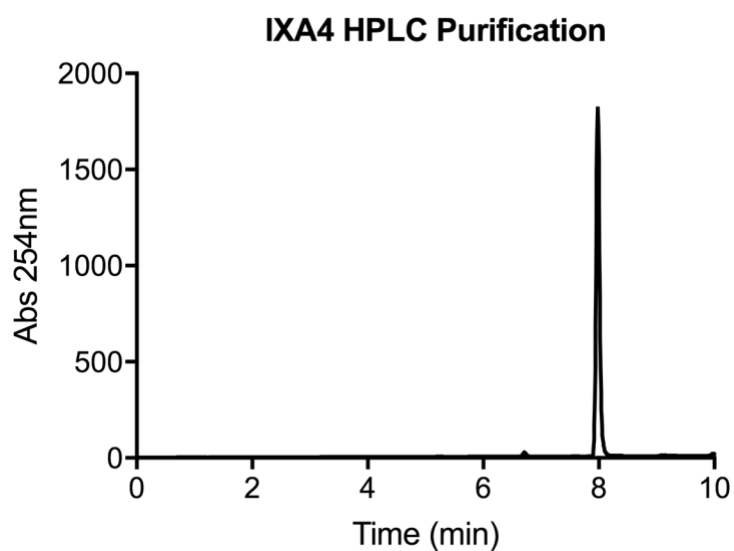

**<sup>1</sup>H NMR** (400 MHz, Acetone-*d*<sub>6</sub>)  $\delta$  9.32 (s, 1H), 7.99 (s, 1H), 7.46 (d, *J* = 7.2 Hz, 1H), 7.28 (t, *J* = 7.8 Hz, 2H), 7.10 (t, *J* = 8.5 Hz, 2H), 6.93 (dd, *J* = 12.5, 8.1 Hz, 3H), 6.84 (d, *J* = 8.0 Hz, 1H), 5.15 (d, *J* = 56.7 Hz, 2H), 4.34 (t, *J* = 6.2 Hz, 2H), 4.21 (t, *J* = 5.2 Hz, 1H), 4.10 (t, *J* = 5.7 Hz, 1H), 3.77 – 3.58 (m, 1H), 3.25 (s, 2H), 3.00 (s, 1H), 2.80 (t, *J* = 6.2 Hz, 2H), 2.26 (d, *J* = 2.9 Hz, 3H).

**<sup>13</sup>C NMR** (126 MHz, Acetone-*d*<sub>6</sub>)  $\delta$  205.31, 129.85, 129.80, 129.37, 120.57, 114.48, 114.32, 114.30, 63.94, 47.66, 35.96, 19.57.

**Table 1. Small molecule screening data**

| <b>Category</b> | <b>Parameter</b>                    | <b>Description</b>                                                                                                                                                                                                                                                                                                                                                                                                                                                                                                                                                                                                                                                                                              |
|-----------------|-------------------------------------|-----------------------------------------------------------------------------------------------------------------------------------------------------------------------------------------------------------------------------------------------------------------------------------------------------------------------------------------------------------------------------------------------------------------------------------------------------------------------------------------------------------------------------------------------------------------------------------------------------------------------------------------------------------------------------------------------------------------|
| Assay           | Type of assay                       | Cell-based, luminescence screen                                                                                                                                                                                                                                                                                                                                                                                                                                                                                                                                                                                                                                                                                 |
|                 | Target                              | ER proteostasis pathways (IRE1/XBP1s activation)                                                                                                                                                                                                                                                                                                                                                                                                                                                                                                                                                                                                                                                                |
|                 | Primary measurement                 | Detection of luminescence for XBP1s-Rluc reporter                                                                                                                                                                                                                                                                                                                                                                                                                                                                                                                                                                                                                                                               |
|                 | Key reagents                        | Renilla-Glo Luciferase detection reagent (Promega Part E2750)                                                                                                                                                                                                                                                                                                                                                                                                                                                                                                                                                                                                                                                   |
|                 | Assay protocol                      | 5ul of cells at 2500 cells per well were added to white 1536 well TC treated plates (Greiner, 789173-F) and incubated overnight at 37C, 5%CO2, 95% RH. Compounds were added using a 30nL pintool and plates were incubated for an additional 18hrs under the same conditions. 5uL of Renilla luciferase substrate was added and plates were incubated for 10 minutes at RT prior to reading for luminescence using the PerkinElmer Viewlux.                                                                                                                                                                                                                                                                     |
|                 | Additional comments                 |                                                                                                                                                                                                                                                                                                                                                                                                                                                                                                                                                                                                                                                                                                                 |
| Library         | Library size                        | 645,000+ compounds                                                                                                                                                                                                                                                                                                                                                                                                                                                                                                                                                                                                                                                                                              |
|                 | Library composition                 | The Scripps Drug Discovery Library (SDDL) currently consists of over 650,000 unique compounds, representing a diversity of drug-like compound scaffolds targeted to traditional and non-traditional drug-discovery biology. The SDDL contains more than 20,000 compounds unique to Scripps and a number of focused sub-libraries for screening popular target classes (e.g. kinases, transferases, GPCRs, ion channels, nuclear receptors, hydrolases, transporters), also diversity discovery sets (e.g. click-chemistry, PAINS-free, FSp3 enriched, covalent inhibitors and natural product collections) as well as clinically relevant compounds and a +3,500 FDA-approved set for drug repurposing studies. |
|                 | Source                              | Scripps Drug Discovery Library (SDDL)                                                                                                                                                                                                                                                                                                                                                                                                                                                                                                                                                                                                                                                                           |
|                 | Additional comments                 |                                                                                                                                                                                                                                                                                                                                                                                                                                                                                                                                                                                                                                                                                                                 |
| Screen          | Format                              | 1536 well                                                                                                                                                                                                                                                                                                                                                                                                                                                                                                                                                                                                                                                                                                       |
|                 | Concentration(s) tested             | 5.17µM                                                                                                                                                                                                                                                                                                                                                                                                                                                                                                                                                                                                                                                                                                          |
|                 | Plate controls                      | Vehicle (DMSO) and Tg (500nM)                                                                                                                                                                                                                                                                                                                                                                                                                                                                                                                                                                                                                                                                                   |
|                 | Reagent/ compound dispensing system | Kalypsys/GNF PinTool compound transfer unit                                                                                                                                                                                                                                                                                                                                                                                                                                                                                                                                                                                                                                                                     |
|                 | Detection instrument and software   | PerkinElmer ViewLux                                                                                                                                                                                                                                                                                                                                                                                                                                                                                                                                                                                                                                                                                             |
|                 |                                     |                                                                                                                                                                                                                                                                                                                                                                                                                                                                                                                                                                                                                                                                                                                 |

|                     |                                                                                  |                                                                                                                                                                                                |
|---------------------|----------------------------------------------------------------------------------|------------------------------------------------------------------------------------------------------------------------------------------------------------------------------------------------|
| Assay validation/QC | EC50 of positive control within 3-fold,<br>Z' $>$ 0.5, %CV of DMSO wells $<$ 10% |                                                                                                                                                                                                |
| Correction factors  | None applied                                                                     |                                                                                                                                                                                                |
| Normalization       | Based on DMSO reference wells (0% activation) and 500 nM Tg (100% activation)    |                                                                                                                                                                                                |
| Additional comments |                                                                                  |                                                                                                                                                                                                |
| Post-HTS analysis   | Hit criteria                                                                     | $>$ 13.83% of Tg positive control                                                                                                                                                              |
|                     | Hit rate                                                                         | 1.56%                                                                                                                                                                                          |
|                     | Additional assay(s)                                                              | Confirmation screening in triplicate,<br>dose response, cytotoxicity                                                                                                                           |
|                     | Confirmation of hit purity and structure                                         | All selected hits were validated through LCMS and/or NMR for purity and structural identification to provide adequate QC for future studies. Note that purity acceptance is set at $\geq$ 80%. |
| Additional comments |                                                                                  |                                                                                                                                                                                                |

**Table 2. Representative 128 compounds from structural analysis of small molecule IRE1/XBP1s activators** (see Excel spreadsheet)

**Table 3. Internal Library Numbers for Selected IRE1/XBP1s Activators** (see Excel spreadsheet)

**Table 4. GO analysis of prioritized IRE1/XBP1s activator transcriptional profiles** (see three tabs in the included Excel spreadsheet)
